# Supplementary material
Source: publisher figshare collection journal article supplement (https://frontiersin.figshare.com/ndownloader/files/31187599)
Supplement: Supplementary file 1 [file 31187599]

**Supplementary Materials**

**Supplementary Tables**

**Supplementary Table 1.** Detailed information of the differential abundance proteins in the stolon of *Ciona robusta* exposed to salinity and temperature stresses. See details in **Supplementary Excel Table S1.**

**Supplementary Table 2****.** Detailed information of the overlapped differential abundance proteins in the stolon of *Ciona robusta* exposed to two levels of salinity and temperature stresses. See details in **Supplementary Excel Table S2.**

**Supplementary Table 3.** Gene ontology enrichment analysis of the differential abundance proteins in the stolon of *Ciona robusta* exposed to low salinity stress. See details in **Supplementary Excel Table S3.**

**Supplementary Table 4.** Gene ontology enrichment analysis of the differential abundance proteins in the stolon of *Ciona robusta* exposed to high salinity stress. See details in **Supplementary Excel Table S4.**

**Supplementary Table 5.** Gene ontology enrichment analysis of the differential abundance proteins in the stolon of *Ciona robusta* exposed to low temperature stress. See details in **Supplementary Excel Table S5.**

**Supplementary Table 6.** Gene ontology enrichment analysis of the differential abundance proteins in the stolon of *Ciona robusta* exposed to high temperature stress. See details in **Supplementary Excel Table S6.**

**Supplementary Table 7.** Kyoto encyclopedia of genes and genomes enrichment analysis of the differential abundance proteins in the stolon of *Ciona robusta* exposed to salinity and temperature stresses. See details in **Supplementary Excel Table S7.**

**Supplementary Figures**


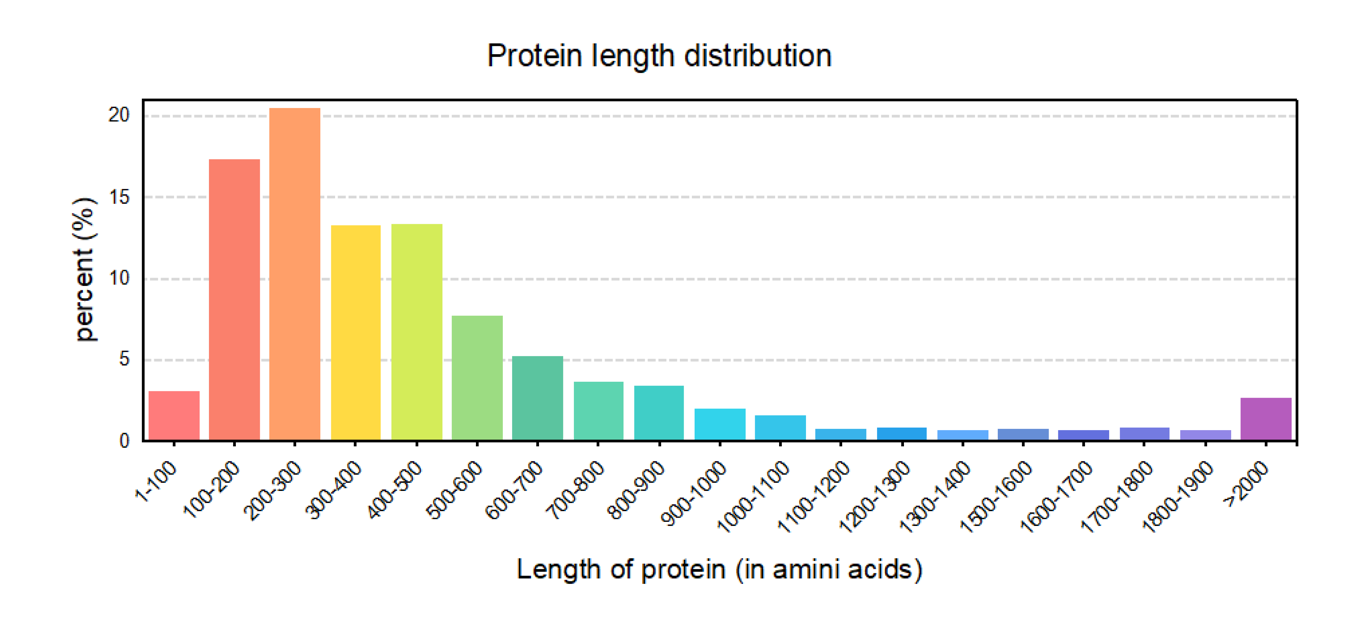


**Supplementary Figure 1.** Distribution of peptide length of the proteins identified from the stolon of *Ciona robusta*. The 𝑥 axis represents the length of the peptide, and the 𝑦 axis represents the number of proteins.
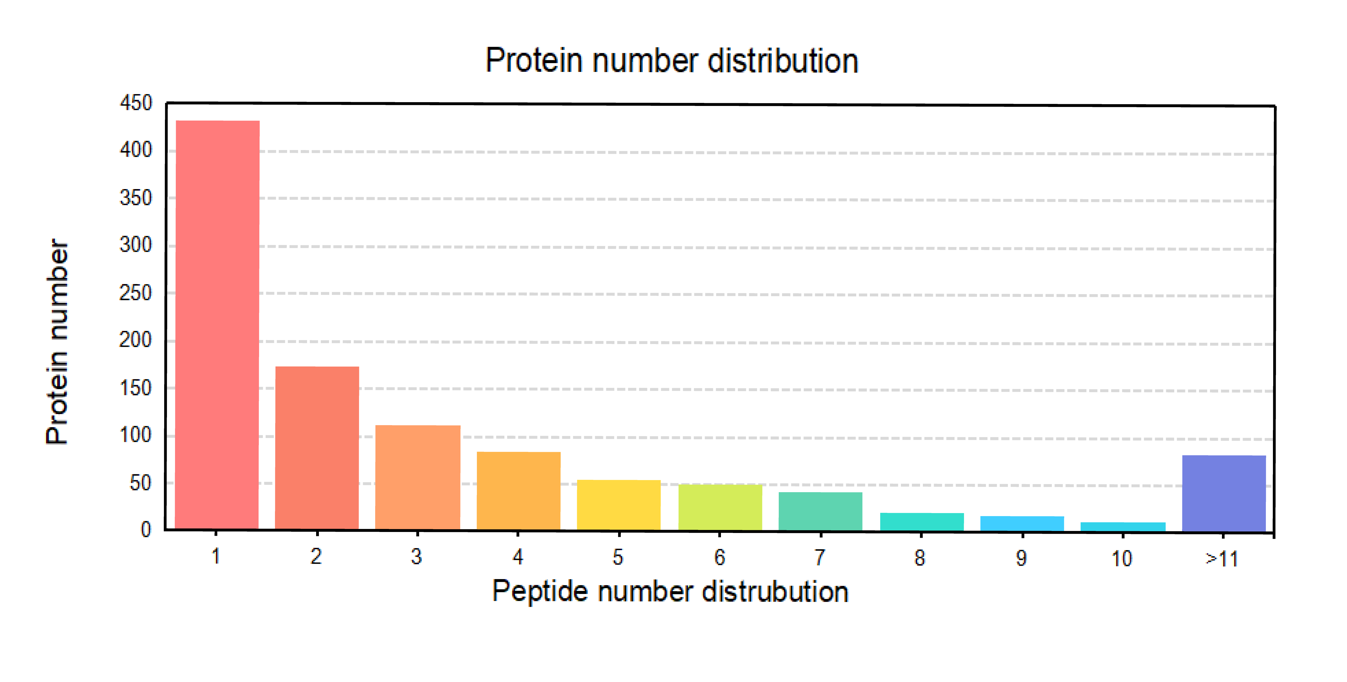


**Supplementary Figure 2.** Distribution of peptide number of the proteins identified from the stolon of *Ciona robusta*. The 𝑥 axis represents the scope of the number of peptide, and the 𝑦 axis represents the number of proteins.


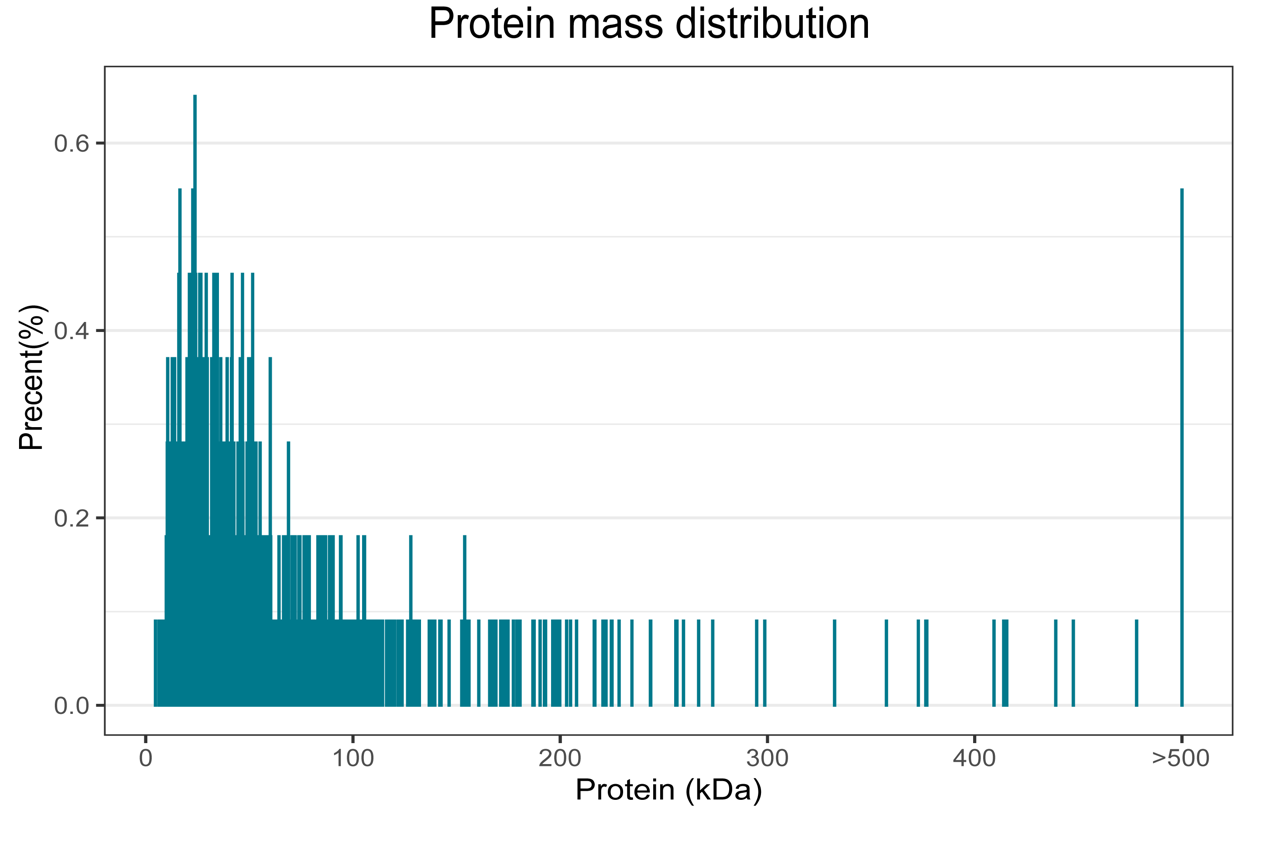


**Supplementary Figure 3.** Distribution of protein molecular weight of the proteins identified from the stolon of *Ciona robusta*. The 𝑥 axis represents the molecular weights (kDa) of the identified proteins, and the 𝑦 axis represents the number of proteins.


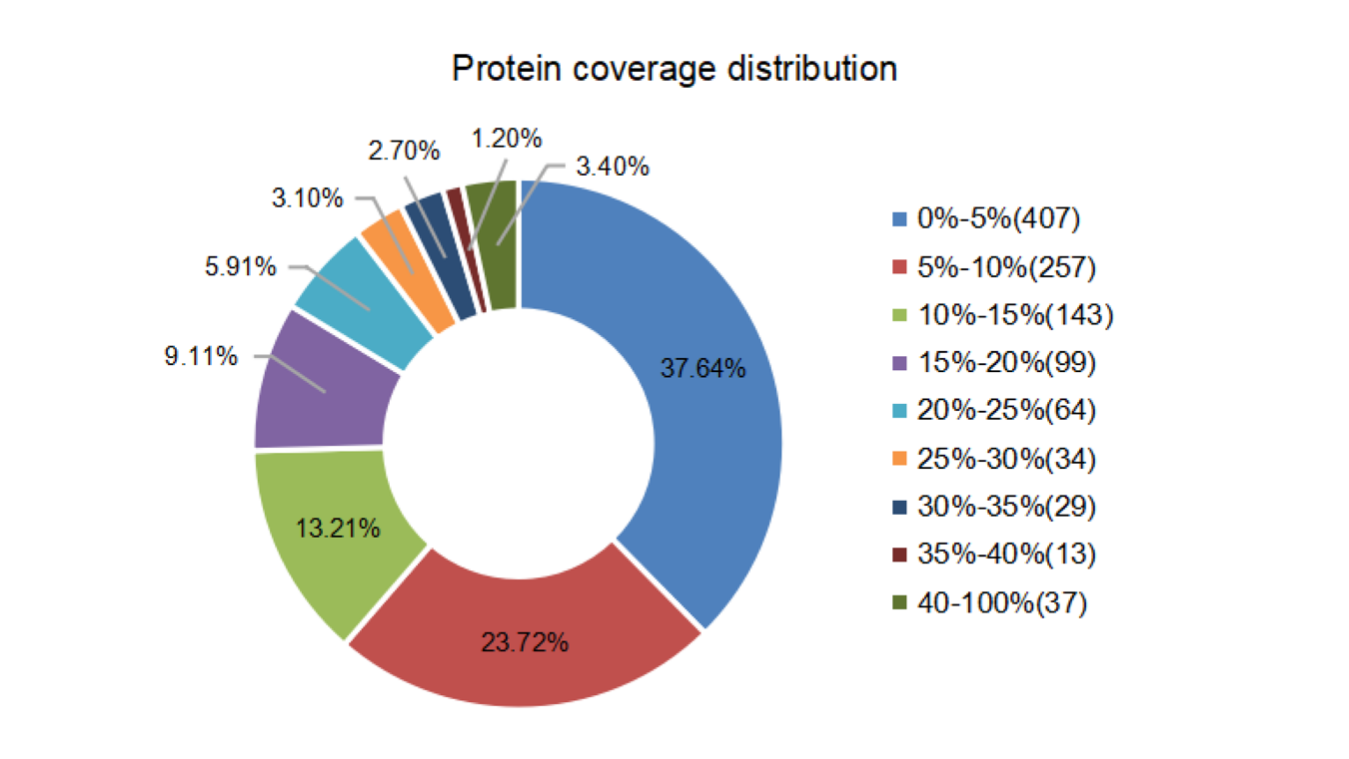


**Supplementary Figure 4.** Distribution of the coverage of the proteins identified from the stolon of *Ciona robusta*. The pie chart shows the proportion of the amount of different proteins within the scope of coverage in the total protein amount.
